# Supplementary material for: Fast network centrality analysis using GPUs
Source: Springer Nature journal article supplement (doi:10.1186/1471-2105-12-149), 2011-05-12

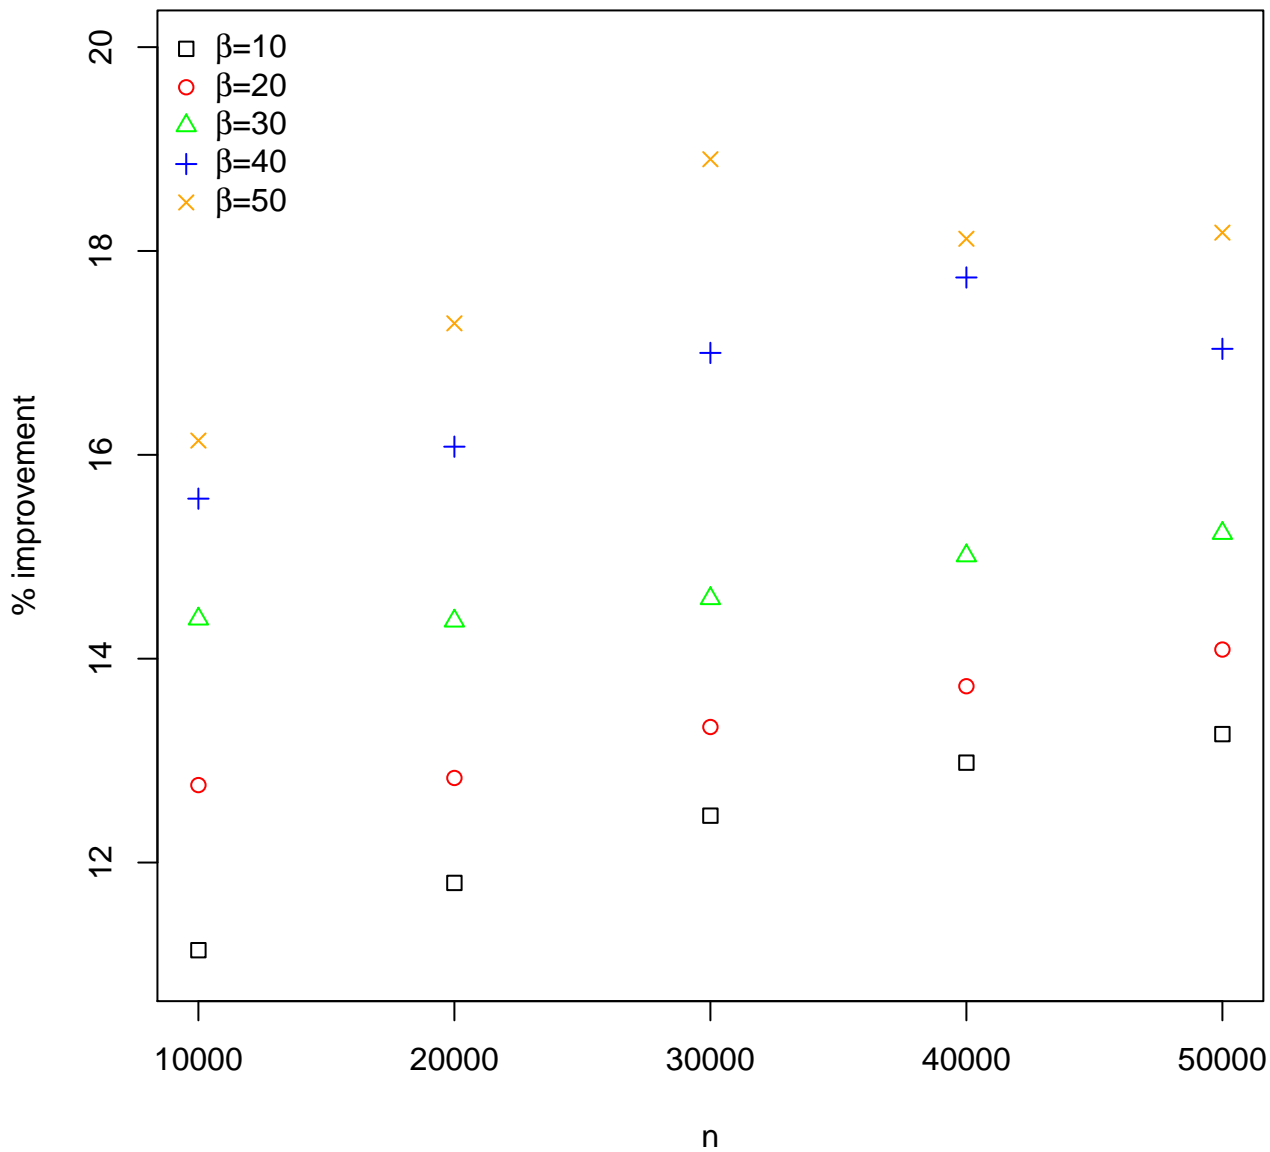

Supplement: 12859_2010_4541_MOESM2_ESM.pdf [file 12859_2010_4541_MOESM2_ESM.pdf]
