# Supplementary material for: Fast network centrality analysis using GPUs
Source: Springer Nature journal article supplement (doi:10.1186/1471-2105-12-149), 2011-05-12
Supplement: 12859_2010_4541_MOESM3_ESM.pdf [file 12859_2010_4541_MOESM3_ESM.pdf]

**n=30,000**

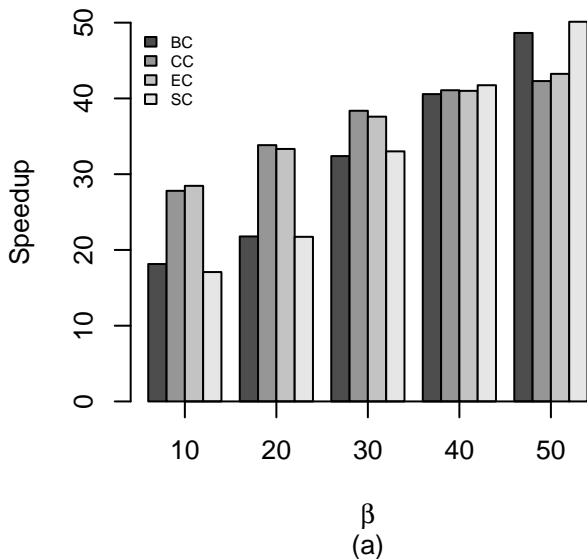

**$\beta=30$**

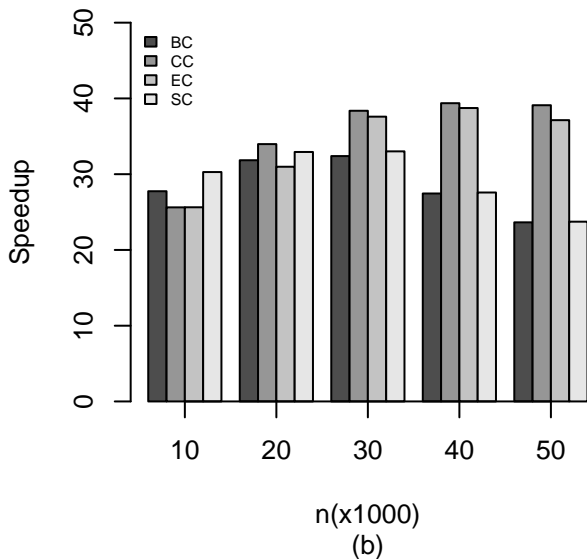

**n=11,660, m=94,146  
(Human PPI)**

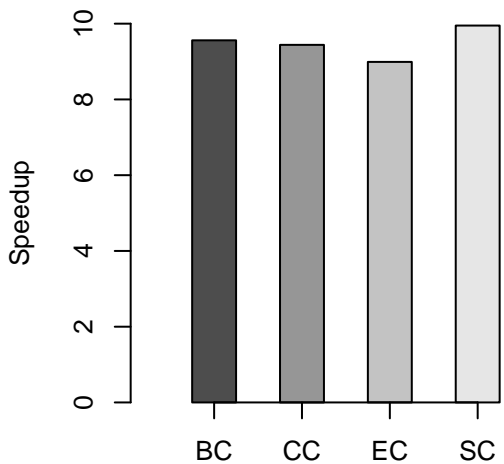

(c)

**n=7,819, m=195,928  
(Breast cancer gene co-expression)**

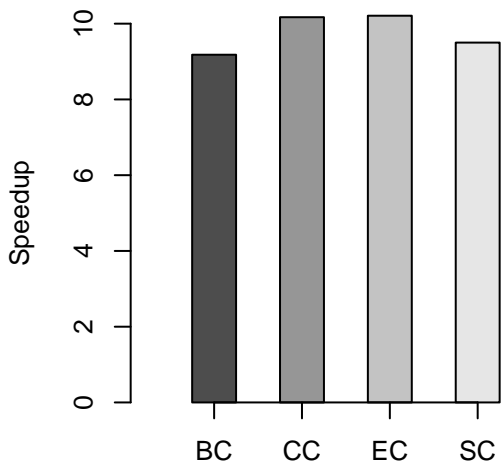

(d)
